# Supplementary material for: Hybrid Necrosis of Wheat: Systematic Genetic Analysis, Fine Mapping, Distribution and Evolution in China
Source: Research Square preprint supplement (doi:10.21203/rs.3.rs-665444/v1), 2021-07-09
Supplement: Supplementary file 1 [file b758f2eb6126c01b9607fcba.xlsx]

## Sheet: Bulks
	Types	Code	Phenotypes	Genotypes	Samples (Each pool containing 60 plants.)
	Positive sample pool	a	Necrosis	Ne1ne1Ne2ne2	10 F1 plants and 10 F2 plants (both containing 5 positive and negative crosses of N9134 and Zhoumai 22), 10 plants in each of the 4 backcross populations ((Zhoumai 22 or N9134) // (N9134 / Zhoumai 22 or Zhoumai 22 / N9134))
	Negative sample bulk	b	Normal	ne1ne1Ne2ne2	30 plants in each of the 2 backcross populations (Zhoumai 22 // (N9134 / Zhoumai 22 or Zhoumai 22 / N9134))
	Negative sample bulk	c	Normal	Ne1ne1ne2ne2	30 plants in each of the 2 backcross populations (N9134 // (N9134 / Zhoumai 22 or Zhoumai 22 / N9134))
